# Supplementary material for: Intrinsic function of the peptidylarginine deiminase PADI4 is dispensable for normal haematopoiesis
Source: PubMed Central journal article supplement (PMC9212077; doi:10.1242/bio.059143), 2022-06-13
Supplement: biolopen-11-059143-s1.pdf [file biolopen-11-059143-s1.pdf]

## Supplementary Figure 1

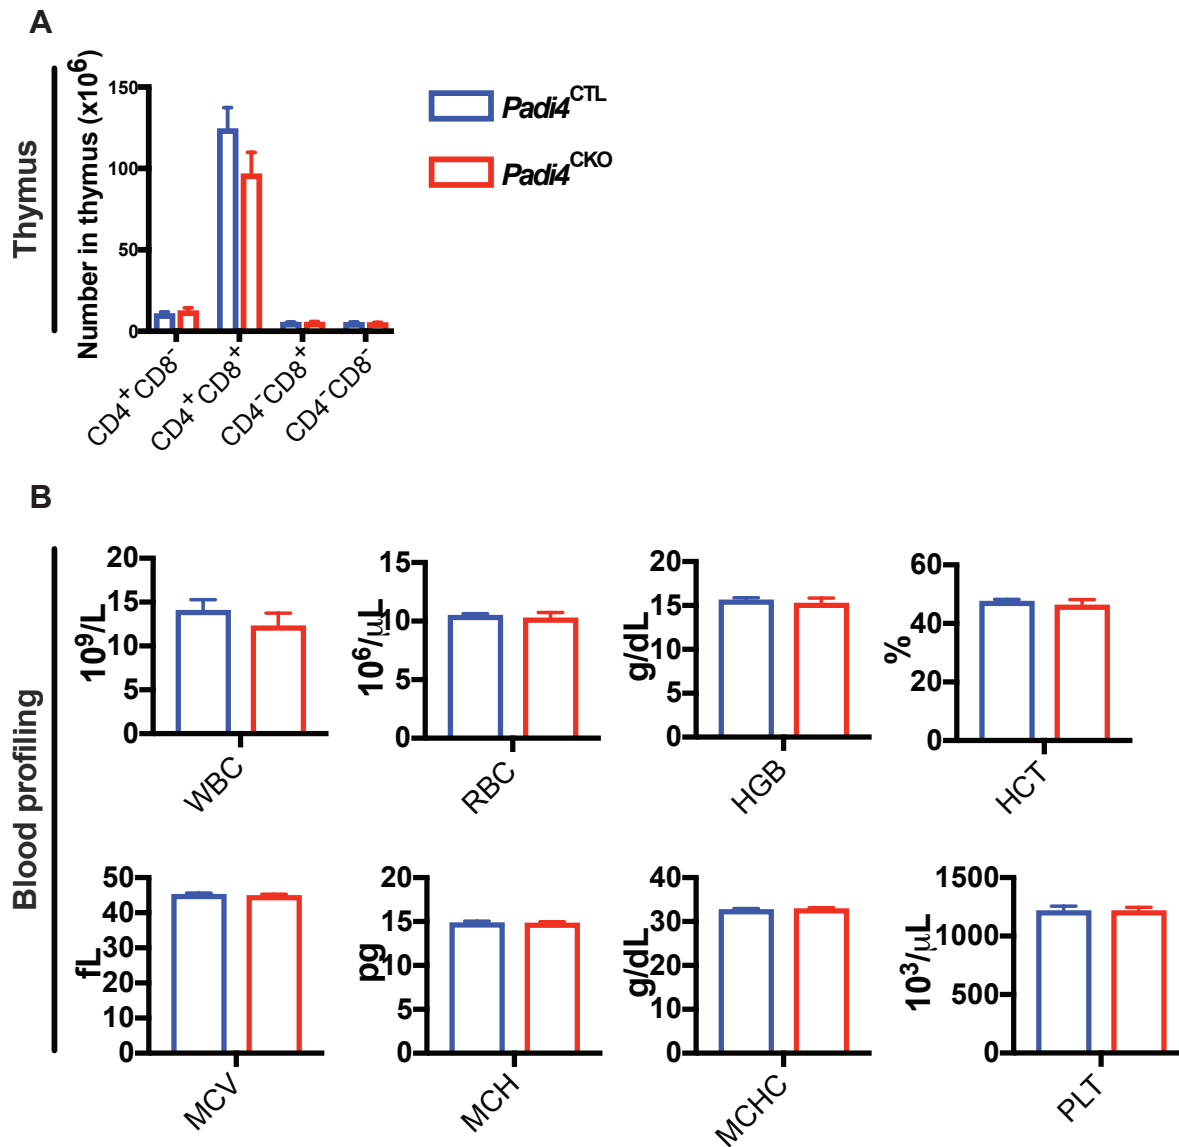

**Fig. S1. Analysis of *Padi4* deletion in steady-state haematopoiesis. (A)** Total number of thymic T cells. *Padi4*<sup>CTL</sup>, n = 9; *Padi4*<sup>CKO</sup>, n = 9. **(B)** Automated cell counting of blood samples from 8-12 week old *Padi4*<sup>CTL</sup> and *Padi4*<sup>CKO</sup>; WBC, RBC, HGB, HCT, MCV, MCH, MCHC and PLT counts. *Padi4*<sup>CTL</sup>, n = 8; *Padi4*<sup>CKO</sup>, n = 6. Data are mean  $\pm$  SEM. \*, P < 0.05; \*\*, P < 0.01; \*\*\*, P < 0.001; \*\*\*\*, P < 0.0001 (Mann-Whitney U test).

## Supplementary Figure 2

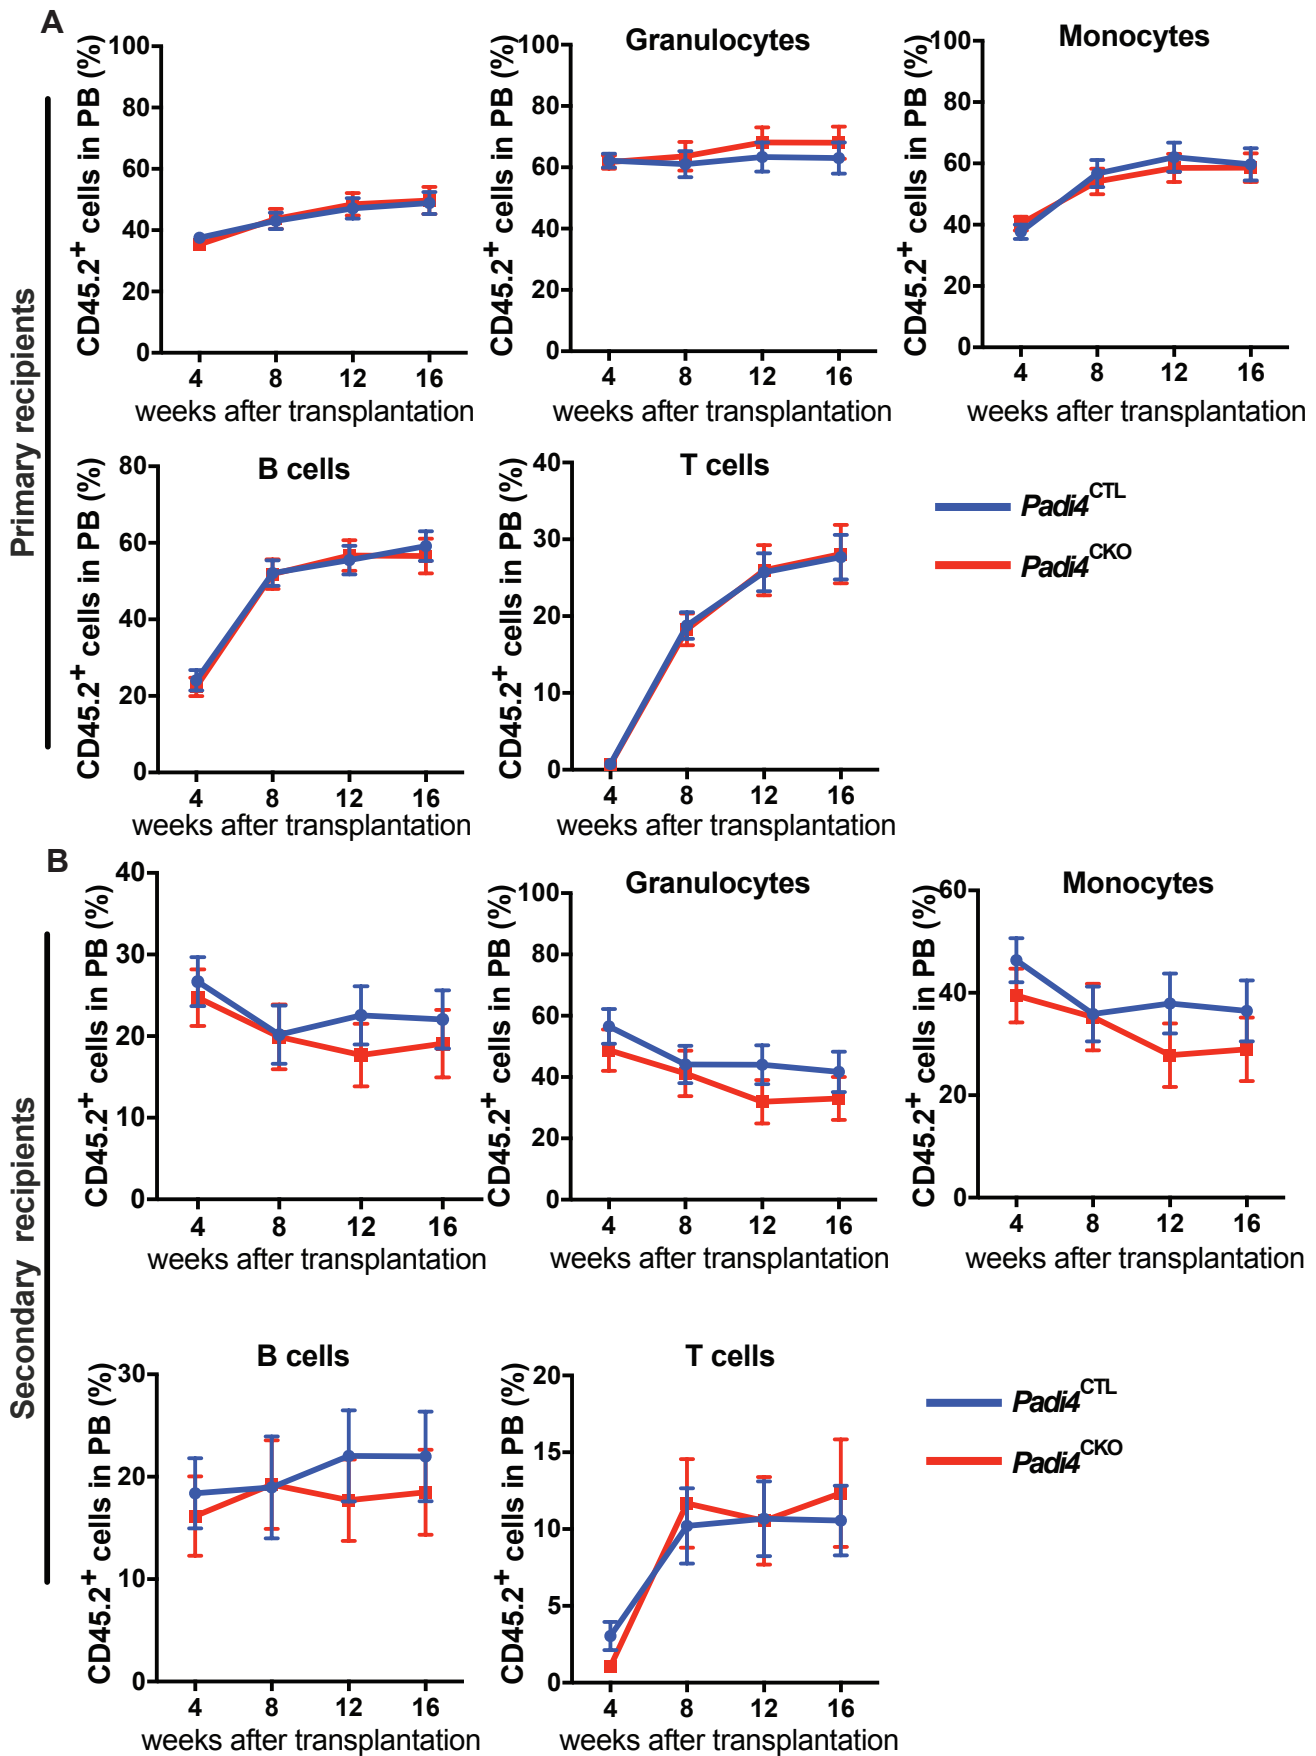

**Fig. S2. Peripheral blood analysis of mice transplanted with *Padi4*<sup>CTL</sup> and *Padi4*<sup>CKO</sup> bone marrow.** Percentage of donor-derived CD45.2<sup>+</sup> cells in PB and contribution of donor derived CD45.2<sup>+</sup> cells to the Granulocyte, Monocyte, B cell and T cell population in PB. **(A)** Analysis of primary recipient mice. *Padi4*<sup>CTL</sup>, n = 36; *Padi4*<sup>CKO</sup>, n = 34. **(B)** Secondary recipient mice. *Padi4*<sup>CTL</sup>, n = 21; *Padi4*<sup>CKO</sup>, n = 22. Data are mean ± SEM. \*, P < 0.05; \*\*, P < 0.01; \*\*\*, P < 0.001; \*\*\*\*, P < 0.0001 (Mann-Whitney U test).

### Supplemental Figure 3

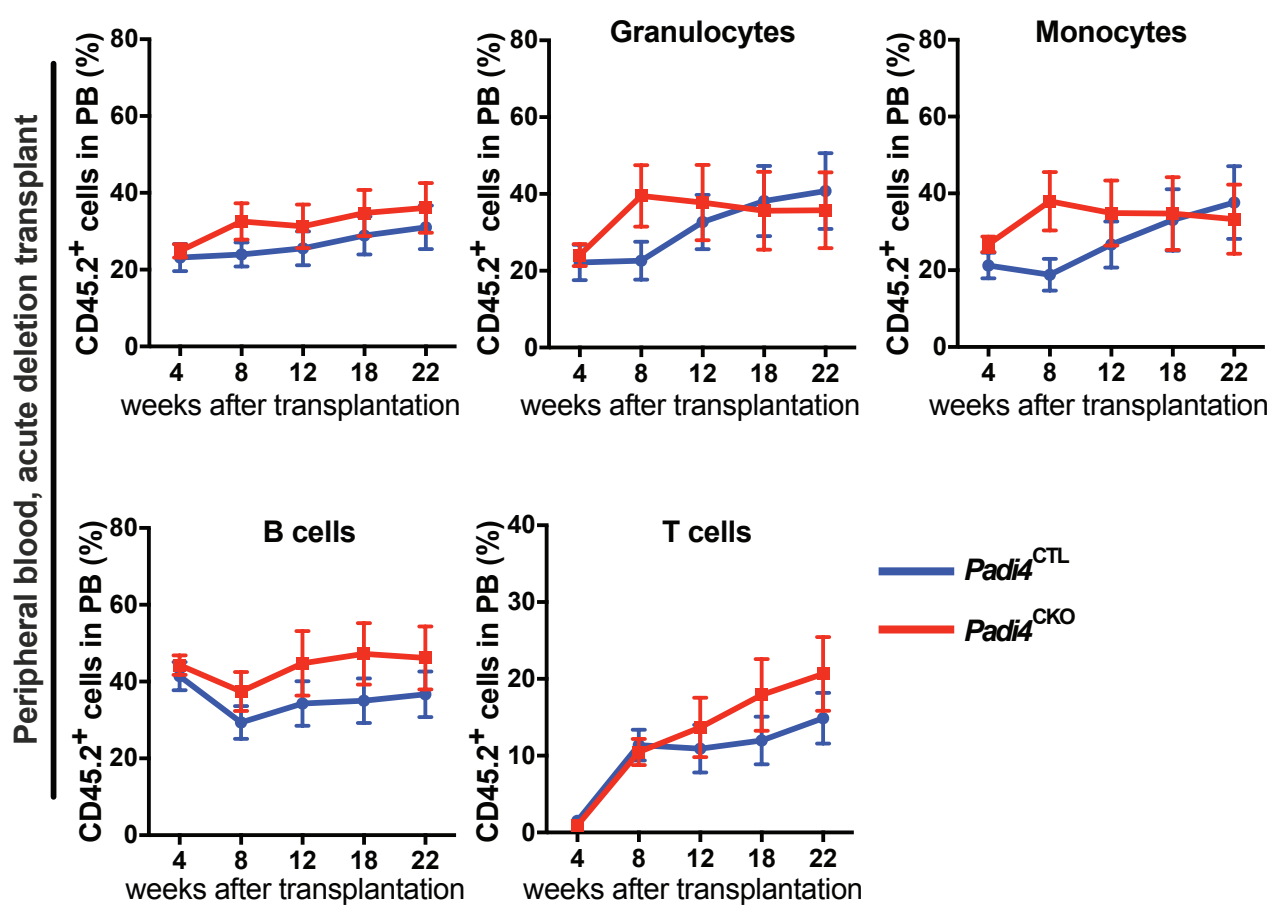

**Fig. S3. Peripheral blood analysis after acute deletion of *Padi4*.** Percentage of donor-derived CD45.2<sup>+</sup> cells in PB and contribution of donor derived CD45.2<sup>+</sup> cells to the Granulocyte, Monocyte, B cell and T cell population in PB of recipient mice, after acute deletion of *Padi4*. n = 15–21 recipients per genotype. n = 3–4 donors per genotype. Data are mean ± SEM. \*, P < 0.05; \*\*, P < 0.01; \*\*\*, P < 0.001; \*\*\*\*, P < 0.0001 (Mann-Whitney U test).

### Supplementary Figure 4

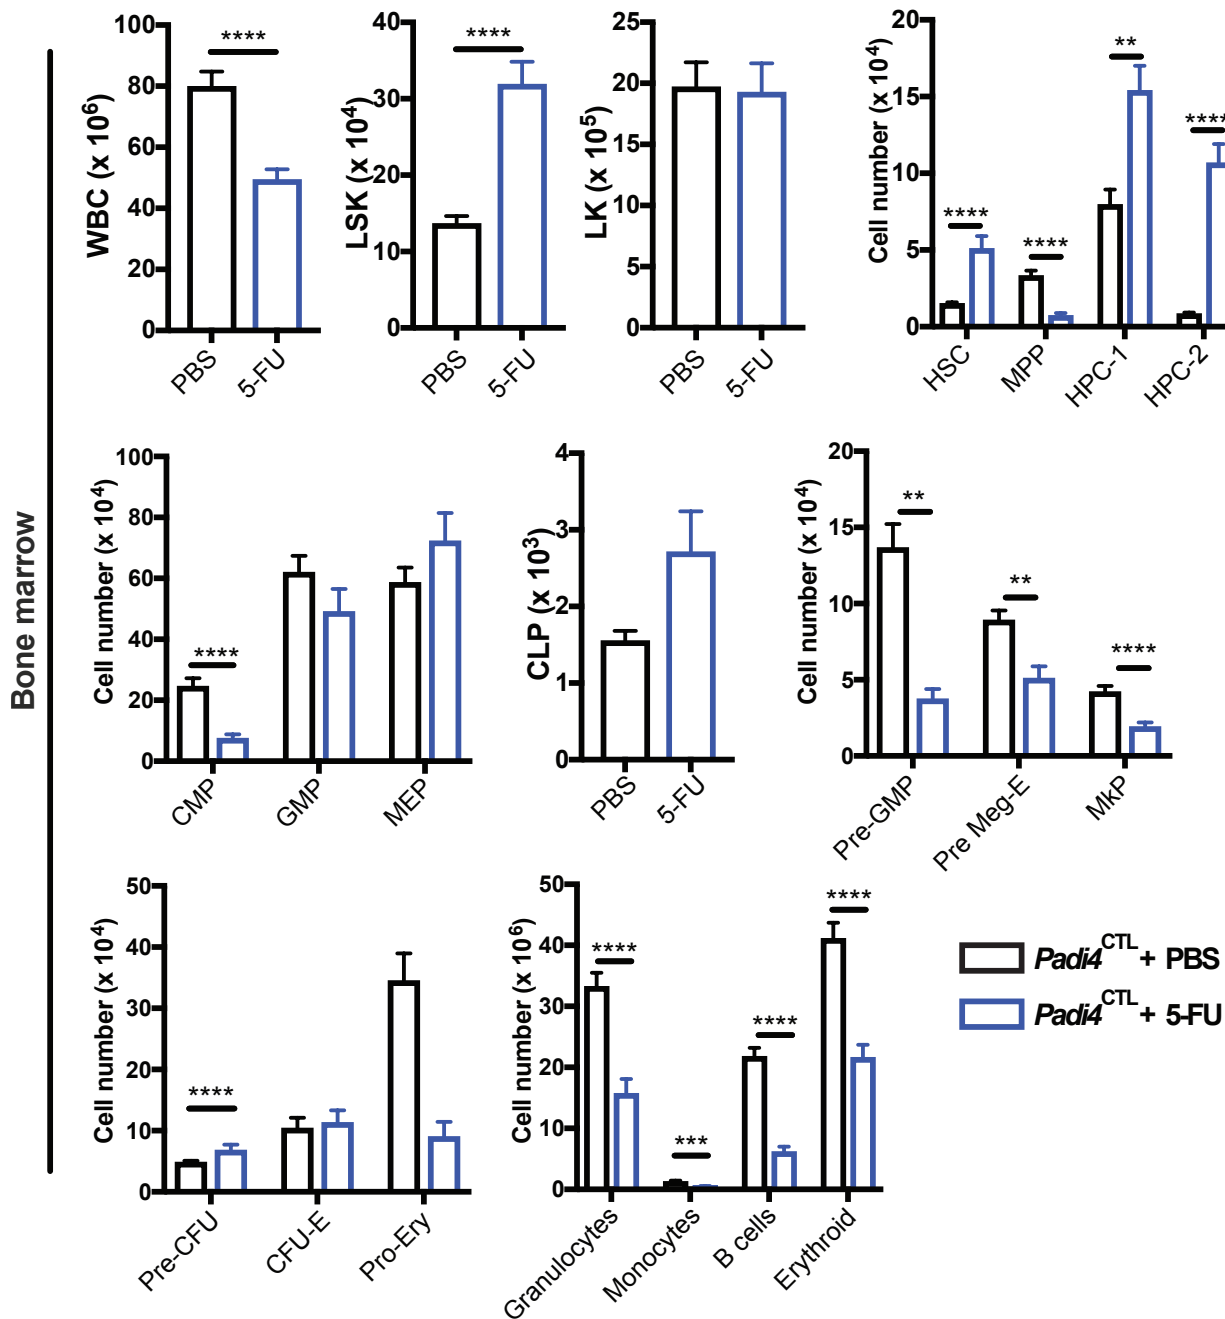

**Fig. S4. 5-FU treatment leads to depletion of all bone marrow cell compartments in *Padi4*<sup>CTL</sup> mice.** Immunophenotypic analysis of *Padi4*<sup>CTL</sup> mice treated with 5-FU or PBS vehicle control, demonstrating efficiency of 5-FU treatment. Experimental setup described in Figure 2A. Analysis was performed 10 days after the final dose of 5-FU; total number of cells in BM; WBC, LSK, and LK, HSC, MPP, HPC-1 and HPC-2 cells, myeloid, erythroid and lymphoid progenitor cells; CMP, GMP, MEP, CLP, Pre-GMP, Pre-MegE, MkP, Pre-CFU, CFU-E, Pro-Ery, differentiated Granulocytes, Monocytes, B cells, Erythroid cells and total number of cells in Spleen; WBC, B cells, Granulocytes and Monocytes *Padi4*<sup>CTL</sup>, n = 21; *Padi4*<sup>CKO</sup> n = 18. Data are mean ± SEM. \*, P < 0.05; \*\*, P < 0.01; \*\*\*, P < 0.001; \*\*\*\*, P < 0.0001 (Mann-Whitney U test).

### Supplementary Figure 5

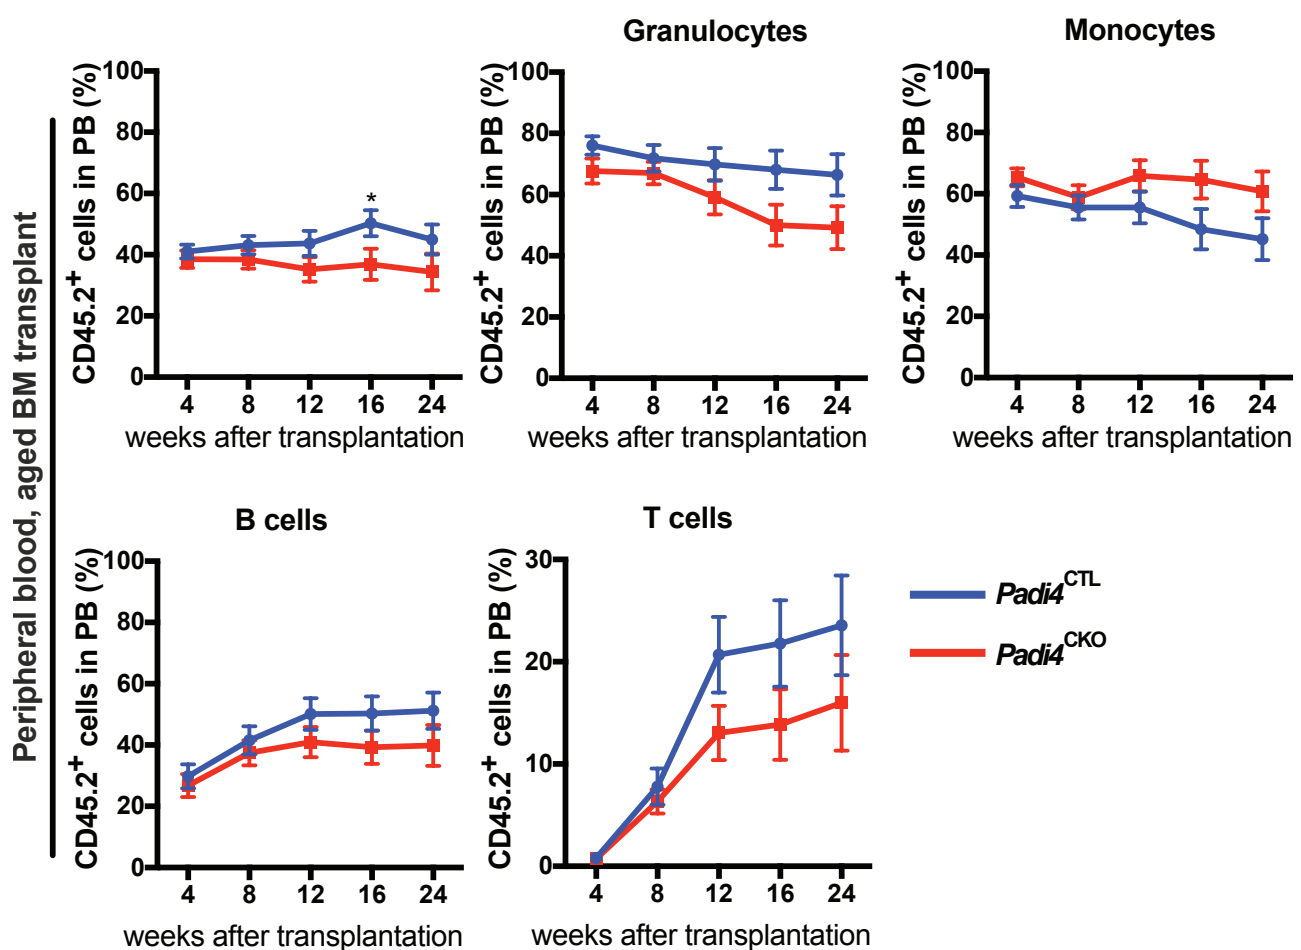

**Fig. S5. Peripheral blood analysis of mice transplanted with aged *Padi4*<sup>CTL</sup> and *Padi4*<sup>CKO</sup> bone marrow.** 200 CD45.2<sup>+</sup> BM HSCs from 1 year old mice were transplanted to primary recipient mice and monitored for 24 weeks following which immunophenotypic analysis was performed on BM and spleen. Percentage of donor-derived CD45.2<sup>+</sup> cells in PB. Contribution of donor derived CD45.2<sup>+</sup> cells to the Granulocyte, Monocyte, B cell and T cell population in PB. *Padi4*<sup>CTL</sup>, n = 20; *Padi4*<sup>CKO</sup>, n = 16. Data are mean ± SEM. \*, P < 0.05; \*\*, P < 0.01; \*\*\*, P < 0.001; \*\*\*\*, P < 0.0001 (Mann-Whitney U test).

**Table S1. List of antibodies used for flow cytometry.** Antibody information for the analyses described in the Materials and Methods section *Flow Cytometry*.

| Antibody      | Conjugate    | Catalog No. | Clone        | Lot No. | Manufacturer   |
|---------------|--------------|-------------|--------------|---------|----------------|
| CD4           | biotin       | 553649      | H129.19      | Various | BD Biosciences |
| CD5           | biotin       | 553019      | 53-7.3       | 5062988 | BD Biosciences |
| CD8a          | biotin       | 553029      | 53-6.7       | Various | BD Biosciences |
| CD11b         | biotin       | 553309      | M1/70        | Various | BD Biosciences |
| CD45R/B220    | biotin       | 553086      | RA3-6B2      | 8127591 | BD Biosciences |
| Ter119        | biotin       | 553672      | TER-119      | Various | BD Biosciences |
| Gr-1/Ly-6G/C  | biotin       | 553125      | RB6-8C5      | 7275907 | BD Biosciences |
| CD45.1        | FITC         | 110706      | A20          | B202563 | Biolegend      |
| CD45.2        | Pacific Blue | 109820      | 104          | B249623 | Biolegend      |
| Ter119        | FITC         | 116206      | TER-119      | B272256 | Biolegend      |
| CD4           | PE           | 130310      | H129.19      | B200770 | Biolegend      |
| CD48          | PE           | 103406      | HM48-1       | B202873 | Biolegend      |
| CD150         | PE-Cy7       | 115914      | TC15-12F12.2 | B238925 | Biolegend      |
| Gr-1/Ly-6G/C  | PE-Cy7       | 108416      | RB6-8C5      | B209822 | Biolegend      |
| CD8a          | APC          | 100712      | 53-6.7       | B207080 | Biolegend      |
| CD8a          | PE           | 100708      | 53-6.7       | B223225 | Biolegend      |
| CD11b         | Pacific Blue | 101224      | M1/70        | B196387 | Biolegend      |
| CD11b         | PE           | 101208      | M1/70        | B228654 | Biolegend      |
| CD11b         | APC          | 101212      | M1/70        | B221810 | Biolegend      |
| CD117/c-Kit   | APC          | 105812      | 2B8          | B249344 | Biolegend      |
| CD117/c-Kit   | BV-510       | 135119      | ACK2         | B209927 | Biolegend      |
| Sca-1/Ly-6A/E | FITC         | 122506      | E13-161.7    | B163258 | Biolegend      |
| Sca-1/Ly-6A/E | PE-Cy7       | 122514      | E13-161.7    | B194434 | Biolegend      |
| Sca-1/Ly-6A/E | Pacific Blue | 122520      | E13-161.7    | B174209 | Biolegend      |
| CD19          | APC-Cy7      | 115530      | 6D5          |         | Biolegend      |
| CD16/CD32     | APC-Cy7      | 101328      | 93           | B232340 | Biolegend      |
| CD71          | PE           | 113808      | R17217       | B194428 | Biolegend      |
| CD127         | BV-421       | 135023      | A7R34        | B241249 | Biolegend      |
| CD34          | FITC         | 553733      | RAM34        | 7341852 | BD Biosciences |
| CD135         | PE           | 553842      | A2F10.1      | 8123884 | BD Biosciences |
| CD41          | APC          | 133914      | MWReg30      | B203704 | Biolegend      |
| CD105         | PE           | 120408      | MJ7/18       | B169023 | Biolegend      |
| Streptavidin  | PerCP        | 405213      | –            | B214631 | Biolegend      |
